# Supplementary material for: Combined determination of copper ions and β-amyloid peptide by a single ratiometric electrochemical biosensor
Source: Royal Society of Chemistry journal article supplement (doi:10.1039/c7an01683b), 2017-11-15
Supplement: c7an01683b1.pdf [file c7an01683b1.pdf]

## Supporting Information

### **Combined determination of Copper ion and $\beta$ -Amyloid peptide by a Single ratiometric Electrochemical Biosensor**

Yanyan Yu,<sup>\*a,†</sup> Peng Wang,<sup>b,†</sup> Xiaodan Zhu,<sup>b,†</sup> Qiwen Peng,<sup>a</sup> Yi Zhou,<sup>b</sup> Tianxiao Yin,<sup>a</sup> Yixin Liang<sup>c</sup> and Xiaoxing Yin<sup>\*a</sup>

<sup>†</sup> Jiangsu Key Laboratory of New Drug Research and Clinical Pharmacy, Xuzhou Medical University, 209 Tongshan Road, Xuzhou 221004, Jiangsu, P.R.China

<sup>‡</sup> Department of Pharmaceutical Analysis, School of Pharmacy, Xuzhou Medical University, 209 Tongshan Road, Xuzhou 221004, Jiangsu, P.R.China

<sup>§</sup> School of Liberal Arts and Science, Shanghai University of Medicine & Health Sciences, 279 Zhouzhu Highway, Shanghai 201318, P.R.China

<sup>†</sup> These authors contributed equally to this work.

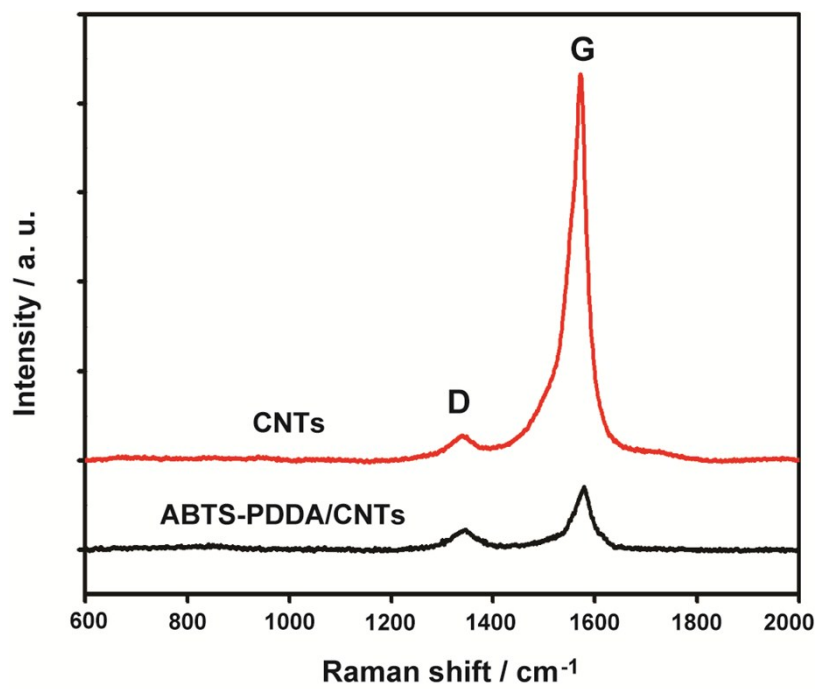

**Fig. S1** Raman spectrum of CNTs and ABTS-PDDA/CNTs.

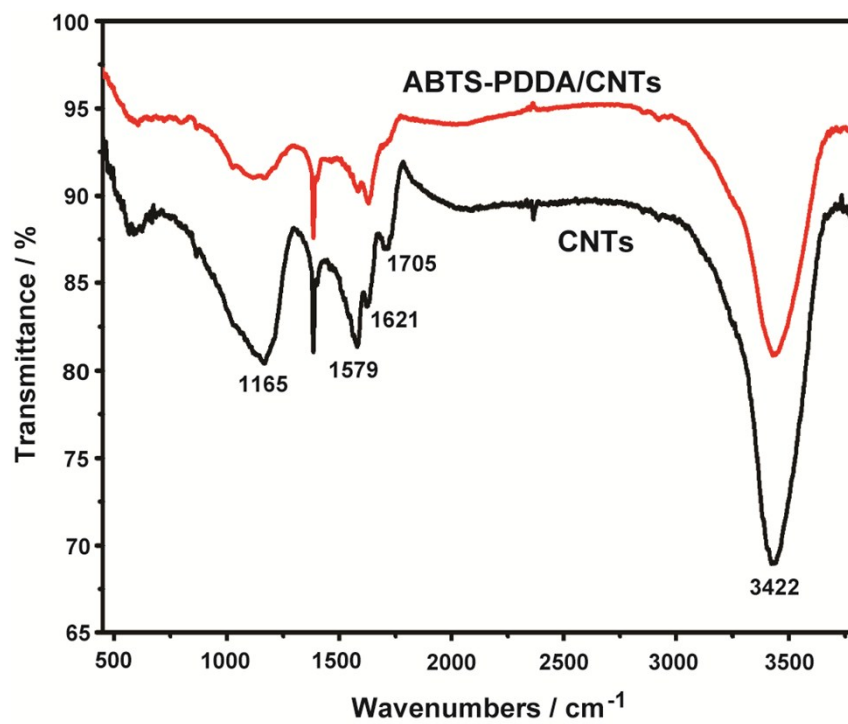

**Fig. S2** FT-IR spectrum of CNTs and ABTS-PDDA/CNTs.

As demonstrated in Fig. S3, after the modification of PDDA/CNTs, two obvious peaks belonging to C 1s and O 1s located at 284.7 and 532.5 eV respectively were observed and the intensity of them gradually increased along with the modification of ABTS and NKB. What's more, the presence of N 1s and S 2p peaks located at 403.1 and 166.3 eV in the ABTS-PDDA/CNTs and ABTS-PDDA/CNTs-NKB composites also demonstrated that ABTS and NKB have both immobilized onto electrode.

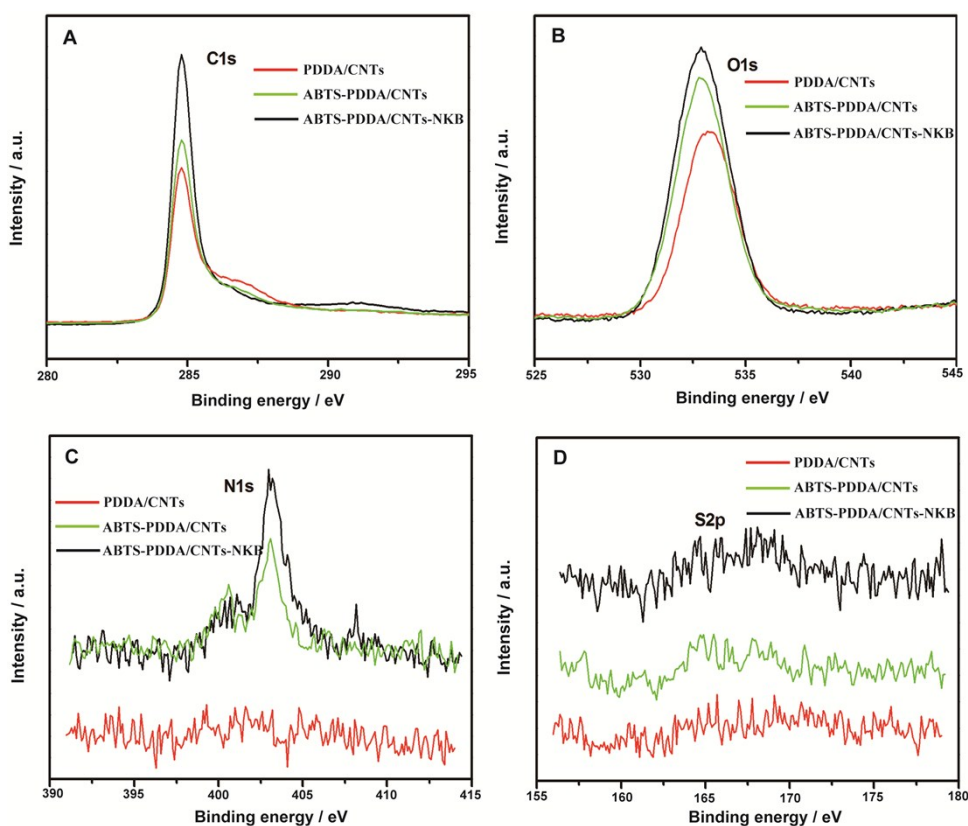

**Fig. S3** XPS spectra of (A) C 1s, (B) O 1s, (C) N 1s and (D) S 2p for samples of PDDA/CNTs, ABTS-PDDA/CNTs and ABTS-PDDA/CNTs-NKB composites.

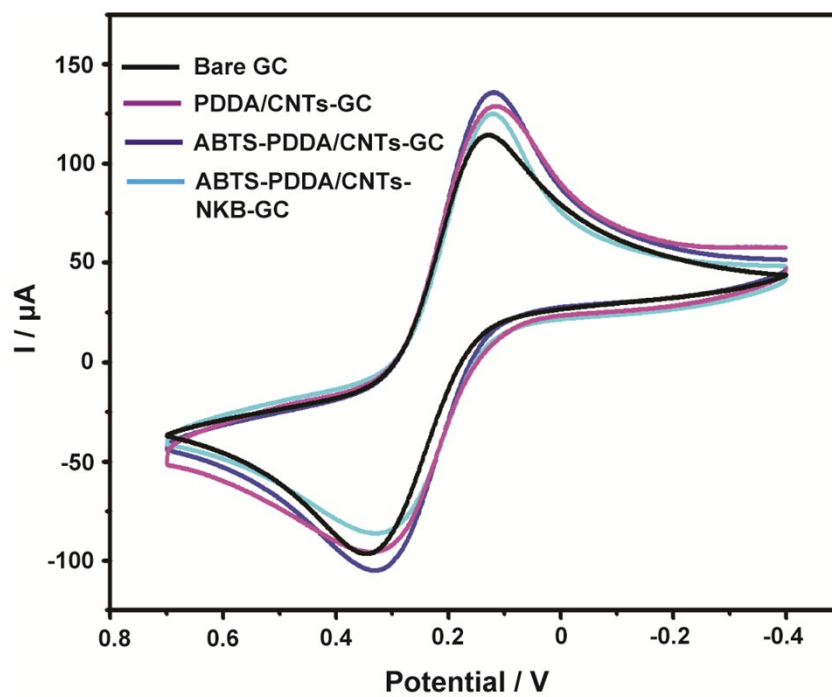

**Fig. S4** Cyclic voltammograms of bare GC, and PDDA/CNTs, ABTS-PDDA/CNTs, ABTS-PDDA/CNTs-NKB modified electrodes in 0.1M KCl solution containing 1mM  $K_3Fe(CN)_6$ .

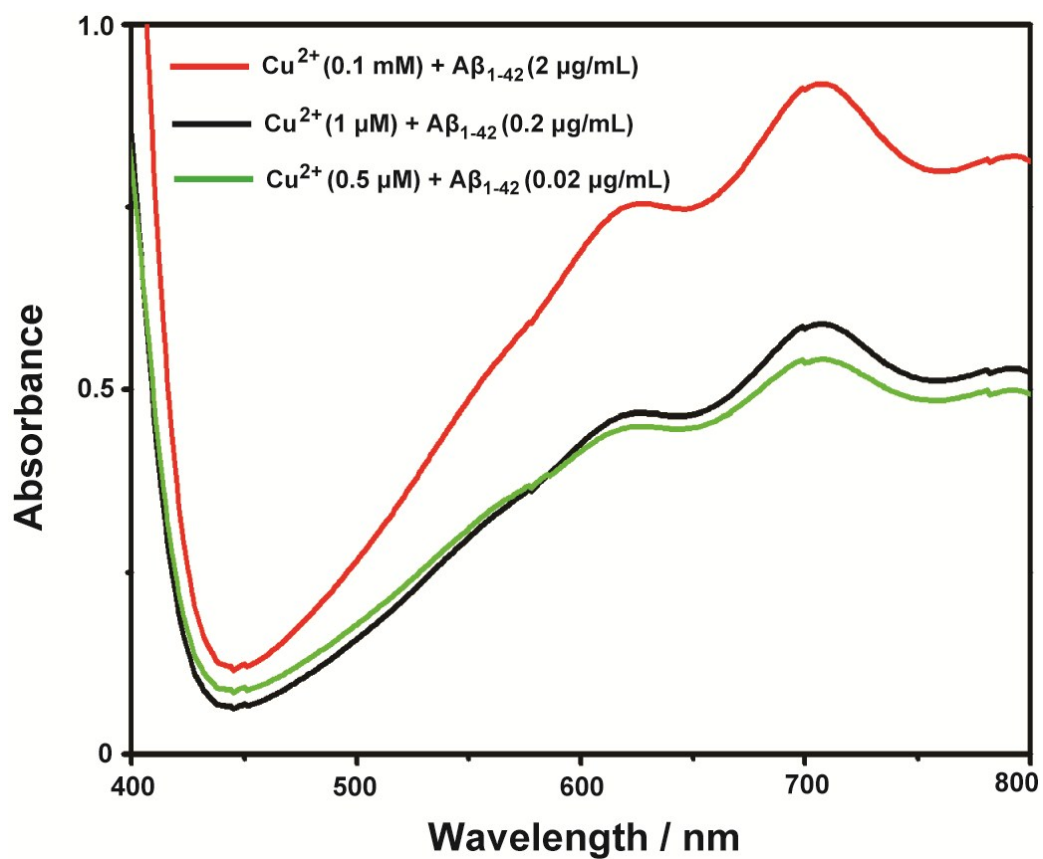

**Fig. S5** The UV-*vis* absorption spectra of the formed Cu<sup>2+</sup> - Aβ<sub>1-42</sub> complex prepared by incubating them with three different concentrations of Cu<sup>2+</sup> and Aβ<sub>1-42</sub> at 37°C. The peroxide activity of Cu<sup>2+</sup> - Aβ<sub>1-42</sub> complex was tested by the catalytic oxidation of ABTS (0.15 mM) in the presence of H<sub>2</sub>O<sub>2</sub> (100 mM).

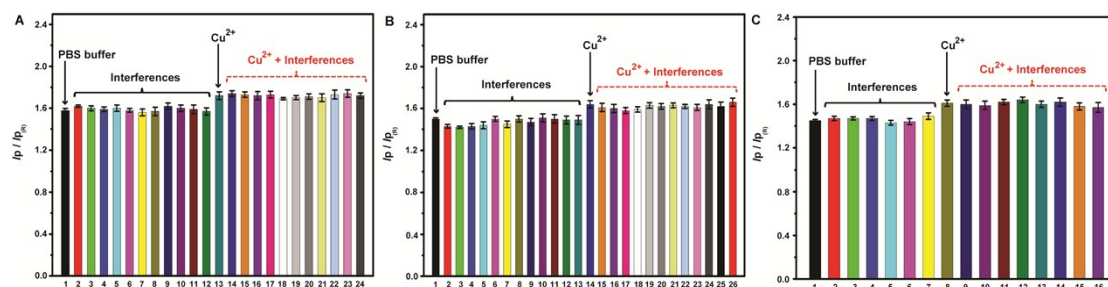

**Fig. S6** Selectivity investigations of  $\text{Cu}^{2+}$  and  $\text{A}\beta_{1-42}$  determination by ABTS-PDDA/CNTs-NKB modified electrode in the presence of other metal ions (A), amino acids (B) and several endogenic species (C). “ $\text{Cu}^{2+}$  + interferences” experiments were carried out by adding  $\text{Cu}^{2+}$  into PBS containing other metal ions, amino acids and other endogenic species. The  $\text{Cu}^{2+}$  concentration was  $9 \mu\text{M}$ . Concentrations of the tested metal ions are  $1 \text{ mM}$  for  $\text{Ca}^{2+}$  (1),  $\text{Mg}^{2+}$  (6),  $\text{Na}^+$  (7) and  $10 \mu\text{M}$  for  $\text{Cd}^{2+}$  (2),  $\text{Co}^{2+}$  (3),  $\text{Cu}^+$  (4),  $\text{Fe}^{3+}$  (5),  $\text{Mn}^{2+}$  (8),  $\text{Ni}^{2+}$  (9),  $\text{Pb}^{2+}$  (10),  $\text{Zn}^{2+}$  (11). The twelve amino acids are all  $5 \mu\text{M}$  for cysteine (1), phenylalanine (2), methionine (3), glycine (4), glutamic acid (5), arginine (6), lysine (7), leucine (8), serine (9), threonine (10), valine (11), histidine (12). Concentrations of the tested endogenic species are  $10 \mu\text{M}$  for ascorbic acid (1), dopamine (2), uric acid (3) and  $1 \text{ mM}$  for glucose (4) and lactate (5). Concentrations of the aggregated  $\text{A}\beta$  form were  $0.1 \mu\text{g/mL}$  for  $\text{A}\beta_{1-38}$  and  $\text{A}\beta_{1-42}$  by incubating them at  $37^\circ\text{C}$  for three days.

**Table S1.** Results of detection of A $\beta_{1-42}$  in hippocampus homogenates from normal and AD groups by the present electrochemical method (Cu<sup>2+</sup> concentration: 0.95  $\mu$ M).

| Samples | Added amount<br>( $\mu$ g/mL) | Detected amount<br>( $\mu$ g/mL) | Recovery<br>(%) | RSD<br>(n = 3) |
|---------|-------------------------------|----------------------------------|-----------------|----------------|
| Normal  | 0.05                          | 0.05                             | 100             | 6.5            |
|         | 0.10                          | 0.11                             | 110             | 7.2            |
|         | 0.30                          | 0.33                             | 110             | 5.9            |
| AD      | 0.02                          | 0.02                             | 100             | 5.6            |
|         | 0.04                          | 0.04                             | 100             | 7.6            |
|         | 0.12                          | 0.11                             | 91.7            | 8.1            |
